1 **Title:**

2 Single-cell RNA sequencing of Tocilizumab-treated peripheral blood mononuclear cells as an in  
3 vitro model of inflammation

4

5 **Authors:**

6 Arya Zarinsefat<sup>1</sup>, George Hartoularos<sup>2</sup>, Sindhu Chandran<sup>3</sup>, Chun J. Yee<sup>2</sup>, Flavio Vincenti<sup>1</sup>, Minnie  
7 M. Sarwal<sup>1</sup>

8

9 **Affiliations:**

10 1. Department of Surgery, University of California, San Francisco, CA

11 2. Department of Bioengineering and Therapeutic Sciences, University of California, San  
12 Francisco, CA

13 3. Department of Medicine, University of California, San Francisco, CA

14

15

16

17

18

19

20

21

22

23

24 **Abstract:**

25

26 COVID-19 has posed a significant threat to global health. Early data has revealed that IL-6, a key

27 regulatory cytokine, plays an important role in the cytokine storm of COVID-19. Multiple trials

28 are therefore looking at the effects of Tocilizumab, an IL-6 receptor antibody that inhibits IL-6

29 activity, on treatment of COVID-19, with promising findings. As part of a clinical trial looking

30 at the effects of Tocilizumab treatment on kidney transplant recipients with subclinical

31 rejection, we performed single-cell RNA sequencing of comparing stimulated PBMCs before

32 and after Tocilizumab treatment. We leveraged this data to create an in vitro cytokine storm

33 model, to better understand the effects of Tocilizumab in the presence of inflammation.

34 Tocilizumab-treated cells had reduced expression of inflammatory-mediated genes and

35 biologic pathways, particularly amongst monocytes. These results support the hypothesis that

36 Tocilizumab may hinder the cytokine storm of COVID-19, through a demonstration of biologic

37 impact at the single-cell level.

38

39

40

41

42

43

44

45

46

47 **1. Introduction**

48 Coronavirus disease 2019 (COVID-19), caused by the severe acute respiratory syndrome  
49 coronavirus 2 (SARS-CoV-2), has posed a significant threat to global health since emerging at  
50 the end of 2019. Although the spectrum of symptomatic infection ranges significantly, and most  
51 infections are not severe<sup>1-3</sup>, the overall global burden of the disease has been significant with  
52 up to nearly 20% mortality in certain geographic/demographic groups<sup>4,5</sup>. While notable  
53 progress has been made in the understanding the virology and disease process, the abrupt  
54 onset and lack of effective vaccination has made treatment of COVID-19 difficult<sup>6,7</sup>.

55

56 Interleukin (IL)-6 is a key regulatory cytokine for the innate and adaptive immune response and  
57 is a growth factor for B cell proliferation and differentiation, an inducer of antibody production,  
58 and a regulator of CD4+ T cell differentiation<sup>8,9</sup>. Early data from the COVID-19 outbreak has  
59 shown that the complications from the disease are partly due to increases in various cytokines,  
60 including IL-6<sup>10-13</sup>, and that elevated IL-6 levels may be associated with worse outcomes<sup>13-15</sup>.

61 Tocilizumab is an IL-6 receptor antibody, which binds to both the membrane-bound and  
62 soluble forms of the IL-6 receptor (IL-6R), thereby inhibiting the action of the  
63 cytokine/receptor complex and interfering with the cytokine's effects<sup>16</sup>. It is a well-studied  
64 and accepted therapy for rheumatoid arthritis<sup>17-19</sup>, and has also been studied in giant cell  
65 arteritis<sup>20</sup> and organ transplantation<sup>9,21,22</sup>. As such, multiple global investigators are currently  
66 undertaking clinical trials to further assess the efficacy of Tocilizumab in the treatment of  
67 COVID-19 and its complications (ClinicalTrials.gov). Thus far, it has been shown that COVID-19  
68 patient plasma inhibits the expression of HLA-DR which may be partially restored by

69 Tocilizumab treatment, and that treatment with Tocilizumab may also improve lymphopenia  
70 associated with COVID-19<sup>23</sup>. Preliminary data for Tocilizumab treatment on COVID-19  
71 outcomes has shown improvement in clinical outcomes<sup>24</sup>. While the clinical effects of  
72 Tocilizumab in inflammatory and autoimmune disease has been well-studied, there is a  
73 paucity of data on the mechanistic/biologic impact of the drug on our immune system.

74

75 Given the current state of the COVID-19 epidemic and possible efficacy of IL-6/IL-6R inhibition  
76 with the use of Tocilizumab, we believed a deeper analysis of the mechanistic/biologic effects  
77 of Tocilizumab could further elucidate the effects of the drug on our immune system. Herein we  
78 present an analysis of the impact of Tocilizumab on immune cells using single-cell RNA  
79 sequencing (scRNA-seq). We map the response of peripheral blood mononuclear cell (PBMC)  
80 subsets to cellular activation using CD3/CD28 stimulation<sup>25-29</sup>. Relevant to understanding the  
81 impact of Tocilizumab in suppressing immune activation and inflammation, as seen in the  
82 COVID-19 response, we additionally examine the effect of Tocilizumab on unstimulated and  
83 stimulated cells, as part of an investigator-initiated clinical trial in kidney transplant (KT)  
84 recipients with subclinical rejection (*NIAID U01 AI113362-01*). We provide a resource  
85 characterizing the effect of Tocilizumab on immune cells at a single-cell level, and demonstrate  
86 the unique and unexpected impact of Tocilizumab on monocytes, and how its effect on  
87 suppressing inflammation may be further augmented based on the resting versus activated  
88 state of PBMCs before exposing the cells to IL-6R inhibition.

89

90

91 **2. Results/Discussion**

92

93 In order to examine the impact of Tocilizumab on the composition and expression of circulating

94 single cells, we compared scRNA-seq data from anti-CD3/CD28 stimulated cells from control

95 (patients not treated with Tocilizumab) PBMCs, to unstimulated PBMCs after 3 to 6 months of

96 Tocilizumab treatment. After filtering cells, a total of 57,737 cells remained for analysis. These

97 cells were put through our analysis pipeline described (see Methods). After UMAP clustering,

98 there were a total of 21 distinct clusters representing major PBMC groups, inclusive of naïve

99 CD4+ T/CD8+ T, activated CD4+ T/CD8+ T, memory CD4+ T/CD8+ T, B, Natural Killer (NK, both

100 CD56+ dim and bright cells<sup>39</sup>), dendritic (DC) cells, and monocytes. Clusters were annotated

101 according to canonical cell type markers (*Figure 1A*). Clusters 2, 4, and 5 expressed markers of

102 memory T cell expansion (*S100A4*, *IL7R*<sup>40,41</sup>) while clusters 0, 8, and 16 expressed markers of

103 CD4+ T cell activation (*TNFRS4*, *CD69*<sup>42</sup>). One cluster of doublets (cluster 20) was removed to

104 give the final annotated clusters (*Figure 1B*).

105

106 Feature plots showing the expression of “cytokine storm”<sup>43</sup> related pro-inflammatory genes are

107 cell-type specific, with predominance for expression in T cell and monocyte clusters (*Figure 1C*).

108 Although many genes are known to be involved in the cytokine storm of COVID-19<sup>37,38</sup>, we

109 demonstrate that some of the key pro-inflammatory genes (cytokines, interferons, and tumor

110 necrosis factor) are also noted as part of the inflammatory profile in control (no Tocilizumab)

111 patients (*Figure 1C*, control cells). Overall, stimulated PBMCs not exposed to Tocilizumab show

112 a dominant signal for T cell activation. After 6 months of treatment with Tocilizumab there is a

113 shift in peripheral blood subset frequencies observed across no treatment (control) vs.

114 treatment (Tocilizumab) groups. In comparison to changes in overall cell types, there was little  
115 observed effect on frequencies of naïve CD4+/CD8+ T cells, DC, or NK cells, but with a marked  
116 reduction of activated CD4+ T cells (approximately 12.5% of control PBMCs were activated  
117 CD4+ T cells, while there were essentially no activated CD4+ T cells in the Tocilizumab group,  
118 *Figure 1D*). Within these different cell subsets, Tocilizumab therapy results in significant  
119 polarization of gene expression based on UMAP presentation (*Figure 1E*), with notable  
120 polarization by treatment status observed in monocytes.

121

122 Given Tocilizumab's function as an IL-6R blocker, we looked at the expression of *IL6*, *IL6R*, as  
123 well as *SOCS1* (feedback inhibitor of IL-6 signaling, expressed upon IL-6 pathway activation<sup>44</sup>),  
124 and *PRDM1* (activated by the *JAK/STAT3* pathway via activation of the IL-6 pathway<sup>45,46</sup>) in  
125 Tocilizumab-treated cells (*Figure 1F*). Tocilizumab-treatment resulted in the expected reduction  
126 of *IL6R*, *SOCS1* and *PRDM1* expression, in CD4+ and CD8+ T cells, and unexpectedly also in  
127 monocytes. *IL6* expression did not appear to be affected by Tocilizumab treatment.

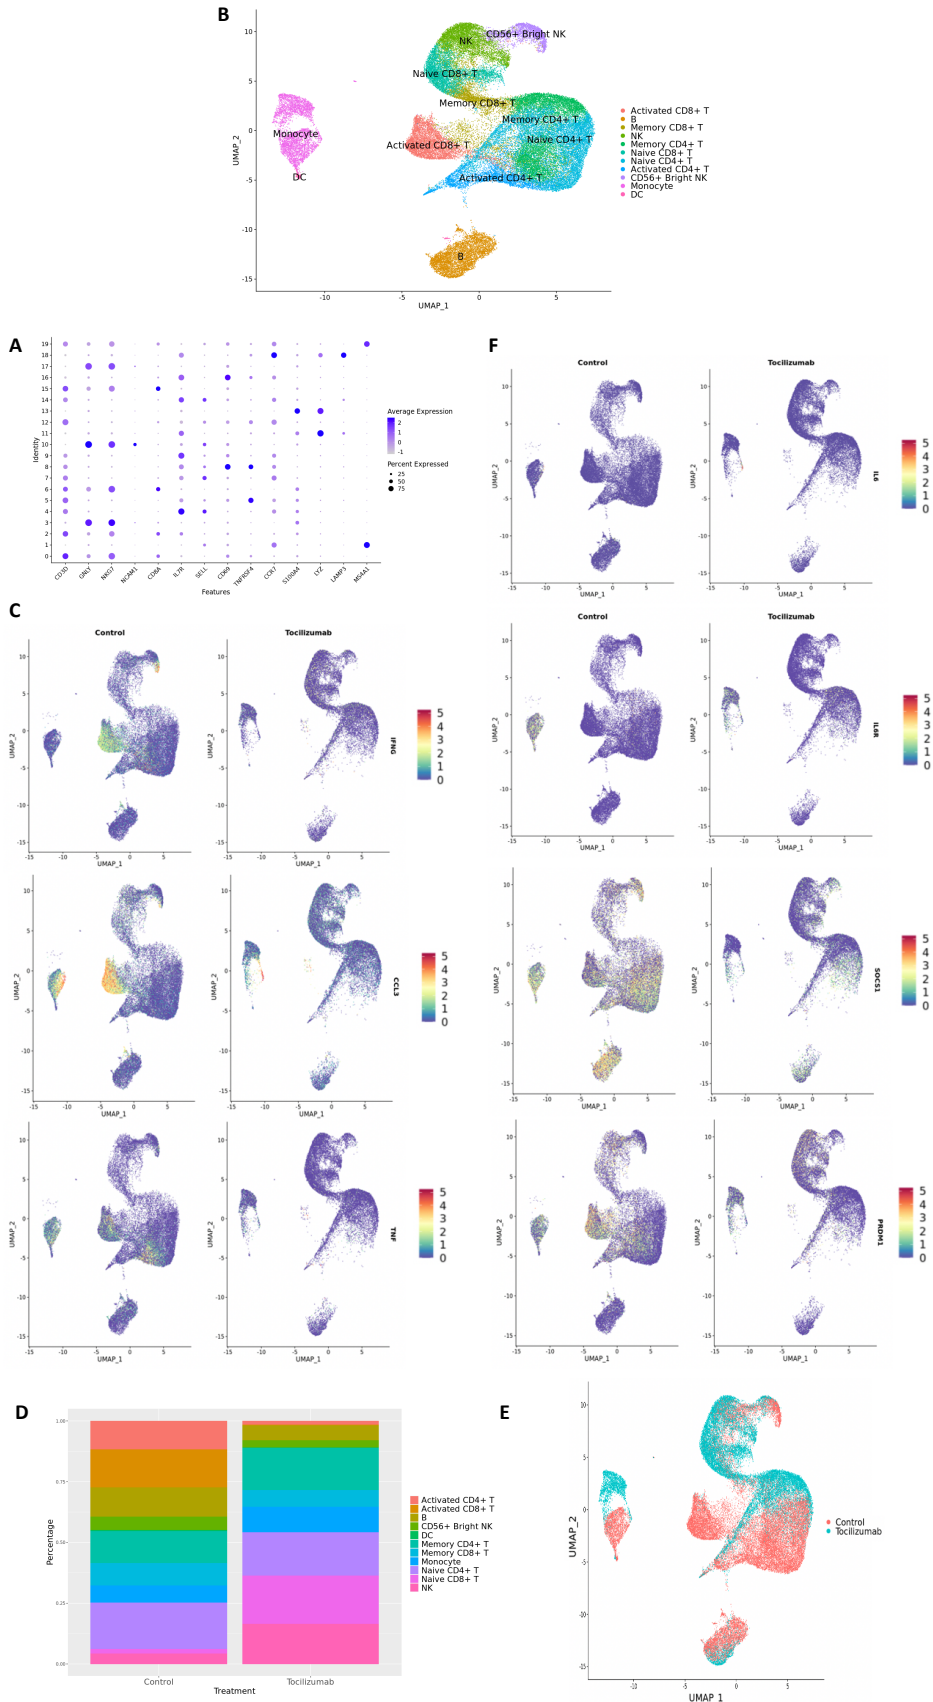

129 **Figure 1:** UMAP clustering, cell subset annotation, and expression of inflammatory markers and  
130 IL6R pathway genes in control vs. Tocilizumab-treated PBMCs  
131 **a**, Dot plot of canonical markers used for annotation of the 20 cell clusters. Average feature  
132 expression represented by color gradient with lower expression represented by light grey, and  
133 higher expression represented by blue. Size of dots represent the percent of cells within that  
134 specific cluster that express the feature of interest **b**, UMAP with final cell type annotations **c**,  
135 Feature plots showing expression of select cytokines involved in SARS-CoV-2 cytokine storm  
136 (*IFNG*, *CCL3*, and *TNF*) based on control vs. Tocilizumab treatment status. Feature expression  
137 represented by color gradient, with low expression represented by blue and high expression  
138 represented by red **d**, Bar plot showing the percentage of each cell type in control vs.  
139 Tocilizumab-treated groups **e**, UMAP with cell clusters identified based on control vs.  
140 Tocilizumab treatment status **f**, Feature plots showing expression of *IL6*, *IL6R*, and downstream  
141 IL6R pathway genes (*SOCS1*, *PRDM1*) based on control vs. Tocilizumab treatment status. Feature  
142 expression represented by color gradient, with low expression represented by blue and high  
143 expression represented by red

144

145

146 We then looked at the top 30 most differentially expressed genes (highest log<sub>2</sub>-fold changes)

147 for control vs. Tocilizumab amongst all cells ([Figure 2A](#)), CD4+ T cells ([Figure 2B](#)), CD8+ T cells

148 ([Figure 2C](#)), monocytes ([Figure 2D](#)), and performed corresponding PA for these genes. PA

149 showed enrichment of inflammatory pathways such IL and TNF signaling amongst control cells.

150 We looked at the top 30 most differentially expressed genes (highest log<sub>2</sub>-fold changes) for

151 control vs. Tocilizumab monocytes ([Figure 2D](#)), with some notable differences as would be

152 expected. Control monocytes were enriched in chemokines such as *CXCL9*, various HLA genes

153 involved in antigen processing<sup>48</sup> (*HLA-DQB1*, *HLA-DRB5*), *CD40* (member of the TNF-receptor

154 superfamily<sup>49</sup>), and *SOCS1* (downstream gene activated by IL-6R pathway, as previously

155 discussed<sup>44</sup>). PA revealed enrichment of many inflammation-related pathways, including

156 interferon, interleukin, T cell receptor (TCR), and PD-1 signaling in control PBMCs, suggesting

157 the relative suppression of these pathways in cells exposed to Tocilizumab.

158



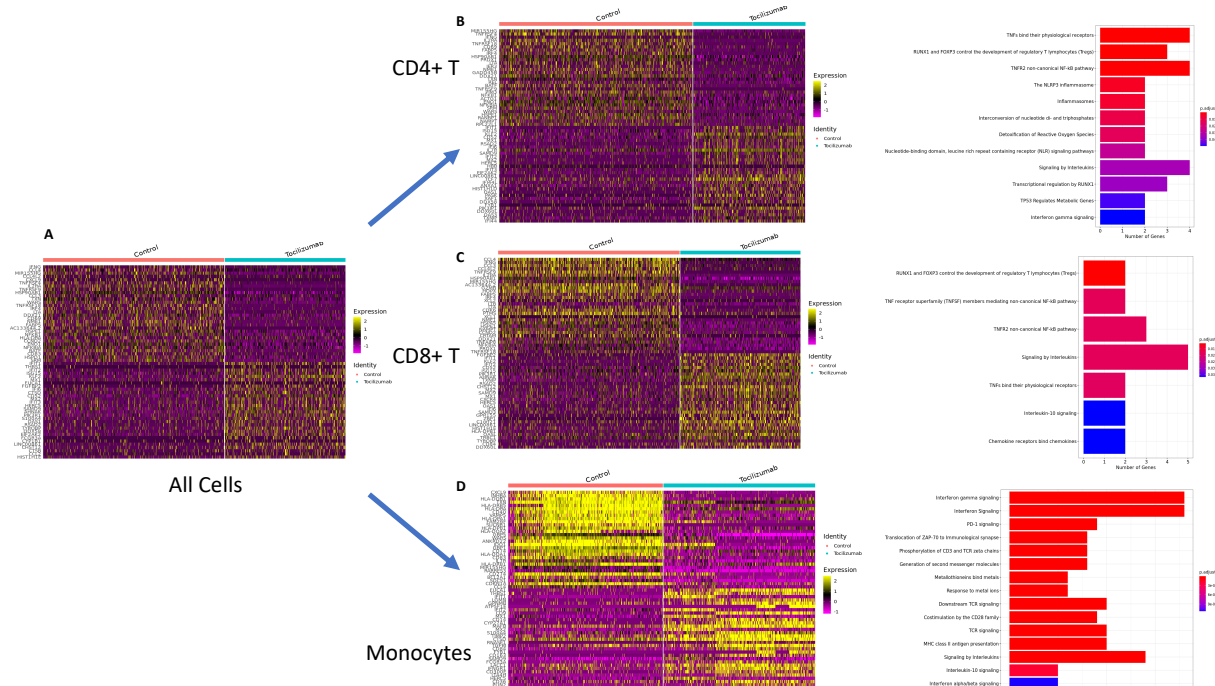

159  
160  
161  
162  
163  
164  
165  
166  
167  
168  
169  
170  
171  
172  
173  
174  
175  
176  
177

**Figure 2:** Differential expression testing and pathway analysis of all cells, CD4+ T cells, CD8+ T cells, and monocytes  
**a**, Heatmap of top 30 genes with highest log-fold changes in all control and Tocilizumab-treated cells **b**, Heatmap of top 30 genes with highest log-fold changes in all CD4+ T control and Tocilizumab-treated cells, with corresponding PA of top 10% most highly differentially expressed genes (based on  $\log_2$ -fold change) in control vs. Tocilizumab cells **c**, Heatmap of top 30 genes with highest log-fold changes in all CD8+ T control and Tocilizumab-treated cells, with corresponding PA of top 10% most highly differentially expressed genes (based on  $\log_2$ -fold change) in control vs. Tocilizumab cells **d**, Heatmap of top 30 genes with highest log-fold changes in all control and Tocilizumab-treated monocytes, with corresponding PA of top 10% most highly differentially expressed genes (based on  $\log_2$ -fold change) in control vs. Tocilizumab cells. Gene expression level represented by color gradient ranging from purple (low expression) to yellow (high expression). PA figure x-axis represents the number of genes from each pathway that was present in the gene list. Adjusted p-values for pathway enrichment are represented as a color gradient with larger p-values colored blue and smaller p-values colored red

178 In addition to the effect of Tocilizumab on T cells, we also observed an unexpected polarization  
 179 of monocytes after Tocilizumab treatment (*Figure 1E*). Notably, the Tocilizumab monocyte  
 180 cluster was enriched for *CD14*, suggestive of an increased presence of classical monocytes<sup>47</sup>,

181 while *CD16/FCGR3A* expression was more evenly expressed between the two clusters (*Figure*  
182 *3A*). We then performed cell trajectory analysis of these monocytes for Tocilizumab treatment  
183 effect, utilizing *Monocle*. This revealed six distinct cell trajectory branches, with two of the  
184 branches containing nearly all control cells not exposed to Tocilizumab, and the other four  
185 branches containing nearly all Tocilizumab-exposed PBMCs (*Figure 3B*), supporting the  
186 presence of unique PBMC trajectories after patient exposure to IL6-R blockade. We utilized  
187 *Monocle's* BEAM function to perform branched expression analysis modeling of the distinct cell  
188 trajectory branches for Tocilizumab-exposed PBMCs (circled branch, *Figure 3B*), which showed  
189 distinct clusters of cells based on treatment status (*Figure 3C*).

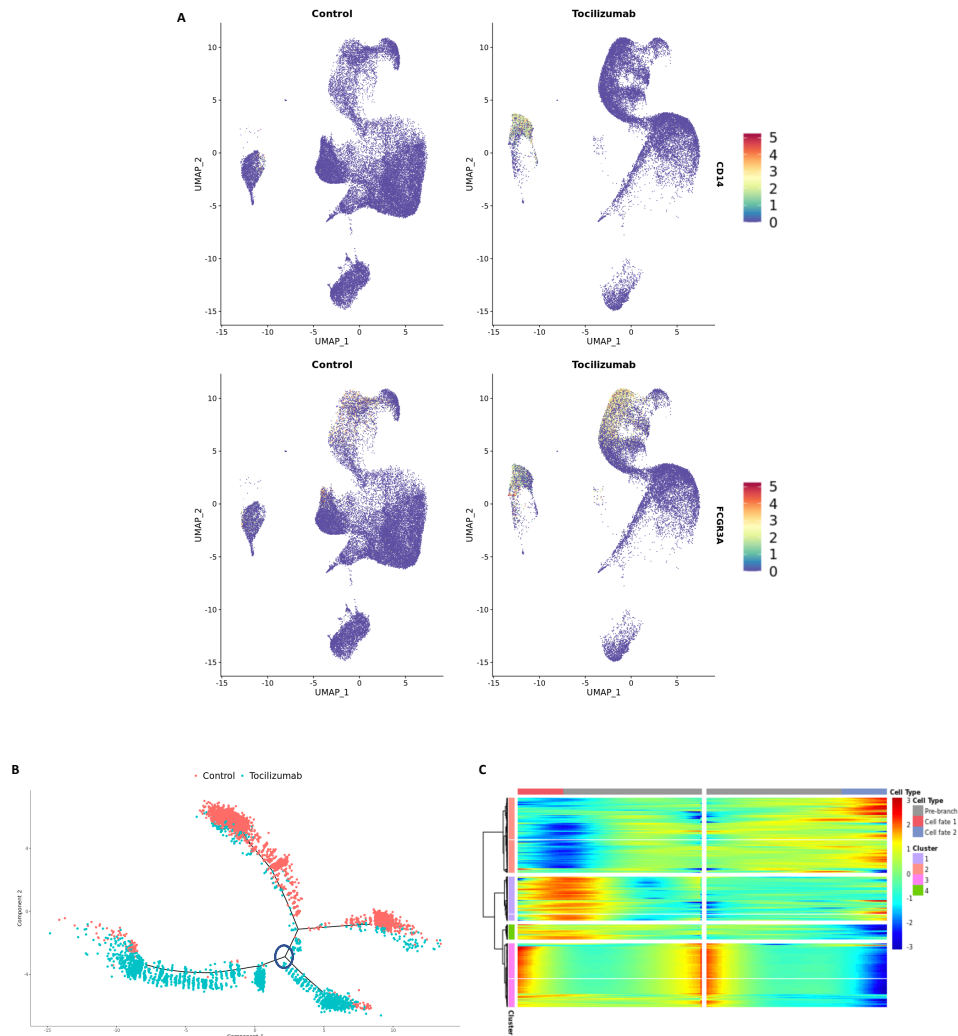

190  
191 **Figure 3:** Differential expression testing and cell trajectory analysis of monocyte subsets  
192 **a**, Feature plots showing expression of CD14 and CD16 based on control vs. Tocilizumab  
193 treatment status. Feature expression represented by color gradient, with low expression  
194 represented by blue and high expression represented by red, with higher CD14 expression  
195 noted in Tocilizumab cells **b**, Cell trajectory analysis of monocyte clusters showing distinct  
196 lineages of control vs. Tocilizumab cells; blue circle represents branch point used in subsequent  
197 heatmap analysis **c**, Heatmap from branched expression analysis modeling for most  
198 differentially expressed genes between branch points from **b** (analyzed branch point marked by  
199 blue circle), showing clusters of differentially expressed genes between branches. Gene  
200 expression represented as color gradient from blue (low expression) to red (high expression).  
201 Cell type annotation represented by two separate cell fates as seen in **b**, with middle of  
202 heatmap representing the start of pseudotime and clear separation of control vs. Tocilizumab  
203 cell fates  
204  
205

206 The results of this study showed that in PBMCs undergoing a cytokine storm signal in  
207 rejection<sup>50</sup>, with overlapping signatures of *IFNG*, *CCL3*, and *TNF* expression, along with TCR  
208 signaling also seen in the cytokine storm of COVID-19<sup>37,38</sup>, there is suppression of these  
209 inflammatory pathways after Tocilizumab treatment. This is inclusive of suppression of  
210 downstream signaling of IL6-R pathway genes in both monocytes and T cells.

211  
212 Monocytes have been shown to play a significant role in the pathophysiology of COVID-19<sup>51</sup>.  
213 A significant expansion of populations of monocytes producing IL-6 has been observed in the  
214 peripheral blood of patients with COVID-19 in ICUs compared with those patients who did not  
215 require ICU hospitalization<sup>52</sup>, with similar findings of increased IL-6 production from monocytes  
216 also seen by scRNA-seq analysis of PBMCs<sup>53</sup>. Our findings are from the first clinical trial utilizing  
217 Tocilizumab for transplant rejection recipients and the first scRNA-seq analysis for such a study.  
218 We show a separation of cell clustering based on treatment status, reduced enrichment of  
219 inflammatory pathways in Tocilizumab patients, and relatively reduced expression of IL-6R  
220 pathway genes in Tocilizumab-treated cells. As would be expected, we did not observe any  
221 differences in IL-6 gene expression between control and Tocilizumab cells (as Tocilizumab is an  
222 IL-6R blocker), but rather only effects on the subsequent function of that cytokine's pathways.  
223 We also show an enrichment of *CD14* expression (associated with classical monocytes) in  
224 Tocilizumab-treated monocytes, which are believed to be phagocytic, but with reduced  
225 inflammatory attributes<sup>47</sup>. This is consistent with our PA described above that shows  
226 enrichment of inflammatory pathways in control cells, but not Tocilizumab-treated cells  
227 (possibly due to the increased presence of non-inflammatory classical monocytes in  
228 Tocilizumab-treated cells).

229 Our findings, in conjunction with the available data on clinical outcomes of Tocilizumab  
230 treatment<sup>24</sup> and ongoing trials, show promise for the use of Tocilizumab in the treatment of  
231 patients with COVID-19. The results of our study support the belief that Tocilizumab may be  
232 effective in reducing the inflammatory burden that results in the adverse outcomes of COVID-  
233 19. Future studies will need to be undertaken to look at outcomes of Tocilizumab treatment for  
234 COVID-19 in a clinical trial setting, ideally in conjunction with scRNA-seq analysis of these  
235 patient's blood samples to achieve a greater understanding of the transcriptomic effects of  
236 infection and treatment at a single-cell level.

### 237 238 **3. Materials and Methods**

#### 239 240 *Sample collection*

241 This study was performed as part of an ancillary to a randomized controlled clinical trial of 15  
242 KT recipients that were diagnosed with subclinical rejection on their 6-month post-transplant  
243 protocol biopsy and randomized to either continue standard of care (Tacrolimus,  
244 mycophenolate, and steroid) immunosuppression (control arm, 8 patients) or standard of care  
245 plus Tocilizumab (Tocilizumab treatment arm, 7 patients). Patients in the treatment arm were  
246 given Tocilizumab at a dose of 8 mg/kg IV every 4 weeks, for a total of 6 doses. Patients in both  
247 arms of the study had blood collected at baseline prior to the initiation of Tocilizumab (in the  
248 treatment arm patients), then at 3, 6, and 12 months after the start of the study, for a total of 4  
249 blood samples per all 15 patients in the study. PBMCs were isolated from blood samples by  
250 Ficoll-Paque™ PLUS density gradient centrifugation (GE Healthcare, Chicago, IL) and frozen in  
251 fetal bovine serum (Gibco, Waltham, MA) containing 10% (vol/vol) dimethyl sulfoxide (Sigma-

252 Aldrich, St. Louis, MS). Cells were frozen and not thawed until the day of the experiment when  
253 they were used directly for in vitro stimulation.

254

#### 255 *Stimulation with anti-CD3 and anti-CD28 antibodies*

256 Frozen PBMCs were thawed, four vials at a time to ensure maximum cell recovery, in a water  
257 bath at 37 Celsius. Cells were counted using a hemacytometer, split in half, and were then  
258 adjusted to  $2 \times 10^5$  cells/well and triplicate plated in multiscreen 96-well plates (Falcon, Corning,  
259 NY). Cells were stimulated with soluble anti-CD3 (5  $\mu\text{g}/\text{mL}$ ; MabTech, Cincinnati, OH) and anti-  
260 CD28 antibodies (10 $\mu\text{g}/\text{mL}$ ; MabTech, Cincinnati, OH) at 37 Celsius, 5%  $\text{CO}_2$  for 24 hours.

261 Unstimulated PBMCs were incubated under identical conditions to reduce any confounding  
262 from incubation conditions other than stimulation. Since all PBMCs were split in half prior to  
263 any downstream processing, all samples from control and Tocilizumab-treated patients at all  
264 study time points were both stimulated and not stimulated as part of the study design.

265

#### 266 *Sample processing*

267 After overnight stimulation/incubation, the cells were harvested and counted using a  
268 hemacytometer and orange acridine solution. Any cell suspension that was less than 25  
269 cells/ $\mu\text{L}$  was disqualified from multiplexing due to low cell counts. Multiplexing cell pools were  
270 designed such that no pair of stimulated and unstimulated samples from the same patient were  
271 in the same pool and such that no samples from the same collection time point were in the  
272 same pool. The same number of cells from each patient and experimental condition were  
273 multiplexed into their respective pools to make a final total of 300,000 cells per pool. Any

274 remaining non-pooled cells were resuspended in RNAlater (Thermo-Fisher, West Sacramento,  
275 CA) and saved for SNP array. Cell pools were then centrifuged at 400g for 5 minutes and media  
276 was aspirated. Cell pellet was resuspended in a small volume of Wash Buffer (0.4% BSA in  
277 1XPBS) and the suspension was filtered through a 40uM cell strainer (Falcon, Corning, NY).

278

### 279 *Library construction and sequencing*

280 scRNA-seq libraries were prepared using the 10X Chromium Single Cell 3' Reagent Kits  
281 v3, according to the manufacturer's instructions. Briefly, the isolated cells were washed once  
282 with PBS + 0.04% BSA and resuspended in PBS + 0.04% BSA to a final cell concentration  
283 of 1000 cells/ $\mu$ L as determined by hemacytometer. Cells were captured in droplets at a  
284 targeted cell recovery of 4000-8000 cells, resulting in estimated multiplet rates of 0.4-5.4%.  
285 Following reverse transcription and cell barcoding in droplets, emulsions were broken and  
286 cDNA purified using Dynabeads MyOne SILANE (Thermo-Fisher, West Sacramento, CA) followed  
287 by PCR amplification (98°C for 3 min; 12-16 cycles of 98°C for 15 sec, 67°C for 20 sec, 72°C for 1  
288 min; 72°C for 1 min). Amplified cDNA was then used for 3' gene expression library construction.  
289 For gene expression library construction, 2.4-50 ng of amplified cDNA was fragmented and end-  
290 repaired, double-sided size selected with SPRIselect beads (Beckman Coulter, West  
291 Sacramento, CA), PCR amplified with sample indexing primers (98°C for 45 sec; 14-16 cycles of  
292 98°C for 20 sec, 54°C for 30 sec, 72°C for 20 sec; 72°C for 1 min), and double-sided size selected  
293 with SPRIselect beads. Pooled cells were loaded in a 10X chip in three replicate wells such that  
294 each well contained 50,000 cells. Given the large number of cells and large number of patient  
295 samples, the entire experiment and sequencing was performed in 2 separate batches to

296 prevent cell death during counting. Each day resulted in 4 unique pools with each pool run in  
297 triplicate wells for sequencing. Sequencing single-cell RNA libraries were sequenced on an  
298 Illumina NovaSeq S2 to a minimum sequencing depth of 50,000 reads/cell using the read  
299 lengths 26bp Read1, 8bp i7 Index, 91bp Read2.

300

### 301 *Demultiplexing*

302 To assign cells to donors of origin in our multiplexed design, we leveraged the genetic  
303 demultiplexing tools *demuxlet*<sup>30</sup> and *freemuxlet*, both a part of the *popsicle* suite of population  
304 genetics tools (<https://github.com/statgen/popsicle>). These tools leverage the genetic  
305 polymorphisms present in transcripts to assign the cells found in each droplet to their donor of  
306 origin. *Demuxlet* uses the genotype calls from a genotyping SNP array to classify cells in  
307 droplets according to their donor of origin, while *freemuxlet* “learns” the genotypes of a pre-  
308 defined number of donors from the transcripts themselves, and assigns the droplets to a  
309 respective anonymous donor according to those learned genotypes. Upon first receiving  
310 sequencing data, *demuxlet* was run with input genotypes from all the patients in the cohort.  
311 While *demuxlet* was able to assign most droplets to donors of origin, it revealed that two  
312 patients in the genotyping SNP array appeared to have identical genotypes (likely due to human  
313 error) and that cells from some patients seemed to drop out (likely due to low viability cells or  
314 inaccurate cell counting or mixing). Therefore, to validate *demuxlet* results, *freemuxlet* was run  
315 using an independent list of SNP sites: exonic SNPs with a minor allele frequency > 0.05 as  
316 observed in the 1000 Genomes Project. In order to leverage the droplets across multiple  
317 microfluidic reactions, which may enable higher confidence in the learned genotypes, we



318 merged the BAMs from multiple experiments containing the same patients into a single BAM  
319 and input this merged BAM into *freemuxlet*. The droplet assignments from the anonymous  
320 donors output by *freemuxlet* were then compared to those from *demuxlet*, showing very high  
321 concordance. Moreover, comparing the VCF generated from *freemuxlet* (using the SNPs present  
322 in the droplets) to the VCF generated from the SNP genotyping array yielded a 1:1  
323 correspondence of anonymous individuals to patients, barring those few problematic patients.  
324 Through comparing VCFs and the presence/absence of individuals in each multiplexed  
325 experiment, we were able to definitively assign a detected genotype to all detected individuals.  
326 Droplet barcodes were then filtered to remove heterotypic droplets containing cells from  
327 multiple individuals, and the remaining homotypic droplets were analyzed downstream.

328

### 329 *Data analysis*

330 Raw FASTQ files were processed using *CellRanger* (v 3.0.1) to map reads against human genome  
331 38 as a reference, filter out unexpressed genes, and count barcodes and unique molecular  
332 identifiers (UMIs). Subsequent analyses were conducted with *Seurat* (v 3.1.2)<sup>31</sup> in *R* (v 3.6.2).  
333 We compared PBMCs from all anti-CD3/CD28 stimulated cells from the study baseline, to  
334 unstimulated Tocilizumab-treated cells from 3 to 6 months post-treatment with Tocilizumab.  
335 Utilizing *Seurat*, we first filtered cells to only keep those that had less than 10% mitochondrial  
336 genes and cells with numbers of features greater than 200 and less than 2,500. Cells were  
337 assigned patient identification based on the *demuxlet/freemuxlet* output described above, and  
338 once patients were identified, additional treatment/stimulation/time metadata could be  
339 applied. Given that our experiment was divided over 2 days given the high number of

340 samples/cells, we applied *Seurat's* SCTransform function for data integration to account for any  
341 possible batch effects from experiment days<sup>32,33</sup>. Once the data was integrated, we continued  
342 downstream data processing. We first determined the principal components (PCA), then  
343 constructed a shared nearest neighbor graph (SNN), identified clusters with a resolution of  
344 0.75, and finally visualized the cells using uniform manifold approximate and projection  
345 (UMAP), per the typical *Seurat* workflow<sup>31</sup>. Clustering was achieved by using 15 components  
346 from the PCA dimensionality reduction.

347

348 To identify cluster-specific markers following the creation of UMAP plots, we utilized  
349 normalized RNA counts of all clusters, scaled the data, and performed differential gene  
350 expression (DE) testing by applying the Wilcoxon rank sum test using *Seurat's* FindMarkers  
351 function<sup>31</sup>. We also plotted normalized and scaled gene expression of canonical markers in  
352 conjunction with DE testing to determine identities of each cluster. To compare cell clusters of  
353 stimulated vs. unstimulated cells, or control vs. Tocilizumab-treated cells, we once again utilized  
354 normalized/scaled RNA counts and performed DE testing with FindMarkers.

355

356 To perform pathway analysis (PA) for any specific comparison we performed, we filtered for all  
357 differentially expressed genes with an adjusted (based on the Bonferroni correction) p-value <  
358 0.05, and then selected the top 10 percentile of genes with the highest log-fold changes. These  
359 top genes were used to perform the PA utilizing the Reactome database<sup>34</sup> with the  
360 *clusterProfiler* package<sup>35</sup>. To perform cell trajectory analysis, we first subset our clusters and cell  
361 types of interest from our *Seurat* workflow, then performed dimensionality reduction and cell

362 ordering with *Monocle*<sup>36</sup> (v 2.14.0). We were then able to plot specific cells by their trajectory  
363 branches based on their pseudotime values assigned by *Monocle*. DE of individual cell trajectory  
364 branches was then performed with *Monocle's* BEAM (branched expression analysis modeling)  
365 function, followed by visualization of these differentially expressed branches with *Monocle's*  
366 heatmap visualization tool.

367

368

369

370

371

372

373

374

375

376

377

378

379

380

381

382

383

384 **Acknowledgements:**

385 The authors thank the many individuals without whose enthusiastic participation and help this  
386 study would never have been accomplished. We would like to acknowledge the following: TA  
387 Sigdel who contributed to the study design, JA Liberto who contributed to study design and cell  
388 culture/isolation, P Rashmi who contributed to the study design, and AA Da Silva who  
389 contributed to cell culture/isolation. A Zarinsefat is funded by the NIH: 5 T32 AI 125222.

390

391 **Competing Interests:**

392 The authors of this study have no financial disclosures or non-financial competing interests to  
393 disclose.

394

395

396

397

398

399

400

401

402

403

404

405

406 **References:**

- 407 1. Chan JF-W, Yuan S, Kok K-H, et al. A familial cluster of pneumonia associated with the  
408 2019 novel coronavirus indicating person-to-person transmission: a study of a family  
409 cluster. *Lancet (London, England)*. 2020;395(10223):514-523
- 410 2. Huang C, Wang Y, Li X, et al. Clinical features of patients infected with 2019 novel  
411 coronavirus in Wuhan, China. *Lancet (London, England)*. 2020;395(10223):497-506
- 412 3. Wang D, Hu B, Hu C, et al. Clinical Characteristics of 138 Hospitalized Patients With 2019  
413 Novel Coronavirus-Infected Pneumonia in Wuhan, China. *JAMA*. February 2020
- 414 4. Onder G, Rezza G, Brusaferro S. Case-Fatality Rate and Characteristics of Patients Dying  
415 in Relation to COVID-19 in Italy. *JAMA*. March 2020
- 416 5. Wu Z, McGoogan JM. Characteristics of and Important Lessons From the Coronavirus  
417 Disease 2019 (COVID-19) Outbreak in China: Summary of a Report of 72314 Cases From  
418 the Chinese Center for Disease Control and Prevention. *JAMA*. February 2020
- 419 6. Ahmed SF, Quadeer AA, McKay MR. Preliminary Identification of Potential Vaccine  
420 Targets for the COVID-19 Coronavirus (SARS-CoV-2) Based on SARS-CoV Immunological  
421 Studies. *Viruses*. 2020;12(3)
- 422 7. Mitja O, Clotet B. Use of antiviral drugs to reduce COVID-19 transmission. *Lancet Glob  
423 Heal*. March 2020
- 424 8. Hunter CA, Jones SA. IL-6 as a keystone cytokine in health and disease. *Nat Immunol*.  
425 2015;16(5):448-457
- 426 9. Jordan SC, Choi J, Kim I, et al. Interleukin-6, A Cytokine Critical to Mediation of  
427 Inflammation, Autoimmunity and Allograft Rejection: Therapeutic Implications of IL-6

- 428 Receptor Blockade. *Transplantation*. 2017;101(1):32-44
- 429 10. Yang Y, Shen C, Li J, et al. Exuberant elevation of IP-10, MCP-3 and IL-1ra during SARS-  
430 CoV-2 infection is associated with disease severity and fatal outcome. *medRxiv*. January  
431 2020:2020.03.02.20029975
- 432 11. Vaninov N. In the eye of the COVID-19 cytokine storm. *Nat Rev Immunol*. April 2020
- 433 12. Mehta P, McAuley DF, Brown M, Sanchez E, Tattersall RS, Manson JJ. COVID-19: consider  
434 cytokine storm syndromes and immunosuppression. *Lancet (London, England)*.  
435 2020;395(10229):1033-1034
- 436 13. Chen X, Zhao B, Qu Y, et al. Detectable serum SARS-CoV-2 viral load (RNAemia) is closely  
437 correlated with drastically elevated interleukin 6 (IL-6) level in critically ill COVID-19  
438 patients. *Clin Infect Dis*. April 2020
- 439 14. Li X, Xu S, Yu M, et al. Risk factors for severity and mortality in adult COVID-19 inpatients  
440 in Wuhan. *J Allergy Clin Immunol*. April 2020
- 441 15. Wan S, Yi Q, Fan S, et al. Relationships among lymphocyte subsets, cytokines, and the  
442 pulmonary inflammation index in coronavirus (COVID-19) infected patients. *Br J*  
443 *Haematol*. April 2020
- 444 16. Lee DW, Gardner R, Porter DL, et al. Current concepts in the diagnosis and management  
445 of cytokine release syndrome. *Blood*. 2014;124(2):188-195
- 446 17. Smolen JS, Aletaha D. Interleukin-6 receptor inhibition with tocilizumab and attainment  
447 of disease remission in rheumatoid arthritis: the role of acute-phase reactants. *Arthritis*  
448 *Rheum*. 2011;63(1):43-52
- 449 18. Singh JA, Beg S, Lopez-Olivo MA. Tocilizumab for rheumatoid arthritis: a Cochrane

- 450 systematic review. *J Rheumatol.* 2011;38(1):10-20
- 451 19. Campbell L, Chen C, Bhagat SS, Parker RA, Ostor AJK. Risk of adverse events including  
452 serious infections in rheumatoid arthritis patients treated with tocilizumab: a systematic  
453 literature review and meta-analysis of randomized controlled trials. *Rheumatology*  
454 (*Oxford*). 2011;50(3):552-562
- 455 20. Kwan CC, Thyparampil PJ. Tocilizumab for Giant Cell Arteritis. *Int Ophthalmol Clin.*  
456 2020;60(2):57-62
- 457 21. Shin B-H, Everly MJ, Zhang H, et al. Impact of Tocilizumab (Anti-IL-6R) Treatment on  
458 Immunoglobulins and Anti-HLA Antibodies in Kidney Transplant Patients With Chronic  
459 Antibody-mediated Rejection. *Transplantation.* 2020;104(4):856-863
- 460 22. Choi J, Aubert O, Vo A, et al. Assessment of Tocilizumab (Anti-Interleukin-6 Receptor  
461 Monoclonal) as a Potential Treatment for Chronic Antibody-Mediated Rejection and  
462 Transplant Glomerulopathy in HLA-Sensitized Renal Allograft Recipients. *Am J Transplant.*  
463 2017;17(9):2381-2389
- 464 23. Giamarellos-Bourboulis EJ, Netea MG, Rovina N, et al. Complex Immune Dysregulation in  
465 COVID-19 Patients with Severe Respiratory Failure. *Cell Host Microbe.* April 2020
- 466 24. Xu X, Han M, Li T, et al. Effective treatment of severe COVID-19 patients with  
467 tocilizumab. *Proc Natl Acad Sci U S A.* 2020;117(20):10970-10975
- 468 25. Pizzolato G, Kaminski H, Tosolini M, et al. Single-cell RNA sequencing unveils the shared  
469 and the distinct cytotoxic hallmarks of human TCRVdelta1 and TCRVdelta2 gammadelta T  
470 lymphocytes. *Proc Natl Acad Sci U S A.* 2019;116(24):11906-11915
- 471 26. Szabo PA, Levitin HM, Miron M, et al. Single-cell transcriptomics of human T cells reveals

- 472 tissue and activation signatures in health and disease. *Nat Commun.* 2019;10(1):4706
- 473 27. Miragaia RJ, Gomes T, Chomka A, et al. Single-Cell Transcriptomics of Regulatory T Cells  
474 Reveals Trajectories of Tissue Adaptation. *Immunity.* 2019;50(2):493-504.e7
- 475 28. Luo T, Zheng F, Wang K, et al. A single-cell map for the transcriptomic signatures of  
476 peripheral blood mononuclear cells in end-stage renal disease. *Nephrol Dial Transplant.*  
477 December 2019
- 478 29. Cai Y, Dai Y, Wang Y, et al. Single-cell transcriptomics of blood reveals a natural killer cell  
479 subset depletion in tuberculosis. *EBioMedicine.* 2020;53:102686
- 480 30. Kang HM, Subramaniam M, Targ S, et al. Multiplexed droplet single-cell RNA-sequencing  
481 using natural genetic variation. *Nat Biotechnol.* 2018
- 482 31. Butler A, Hoffman P, Smibert P, Papalexi E, Satija R. Integrating single-cell transcriptomic  
483 data across different conditions, technologies, and species. *Nat Biotechnol.*  
484 2018;36(5):411-420
- 485 32. Stuart T, Butler A, Hoffman P, et al. Comprehensive Integration of Single-Cell Data. *Cell.*  
486 2019;177(7):1888-1902.e21
- 487 33. Hafemeister C, Satija R. Normalization and variance stabilization of single-cell RNA-seq  
488 data using regularized negative binomial regression. *bioRxiv.* January 2019:576827
- 489 34. Fabregat A, Sidiropoulos K, Viteri G, et al. Reactome pathway analysis: a high-  
490 performance in-memory approach. *BMC Bioinformatics.* 2017;18(1):142
- 491 35. Yu G, Wang L-G, Han Y, He Q-Y. clusterProfiler: an R package for comparing biological  
492 themes among gene clusters. *OMICS.* 2012;16(5):284-287
- 493 36. Qiu X, Hill A, Packer J, Lin D, Ma Y-A, Trapnell C. Single-cell mRNA quantification and



- 494 differential analysis with Census. *Nat Methods*. 2017;14(3):309-315
- 495 37. Ye Q, Wang B, Mao J. The pathogenesis and treatment of the 'Cytokine Storm' in COVID-  
496 19. *J Infect*. 2020;80(6):607-613
- 497 38. Chua RL, Lukassen S, Trump S, et al. COVID-19 severity correlates with airway epithelium-  
498 immune cell interactions identified by single-cell analysis. *Nat Biotechnol*. June 2020
- 499 39. Michel T, Poli A, Cuapio A, et al. Human CD56bright NK Cells: An Update. *J Immunol*.  
500 2016;196(7):2923-2931
- 501 40. Salek-Ardakani S, Croft M. Regulation of CD4 T cell memory by OX40 (CD134). *Vaccine*.  
502 2006;24(7):872-883
- 503 41. Martin MD, Badovinac VP. Defining Memory CD8 T Cell . *Front Immunol* . 2018;9:2692
- 504 42. Simms PE, Ellis TM. Utility of flow cytometric detection of CD69 expression as a rapid  
505 method for determining poly- and oligoclonal lymphocyte activation. *Clin Diagn Lab*  
506 *Immunol*. 1996;3(3):301-304
- 507 43. Tisoncik JR, Korth MJ, Simmons CP, Farrar J, Martin TR, Katze MG. Into the eye of the  
508 cytokine storm. *Microbiol Mol Biol Rev*. 2012;76(1):16-32
- 509 44. Prêle CM, Woodward EA, Bisley J, Keith-Magee A, Nicholson SE, Hart PH. SOCS1 regulates  
510 the IFN but not NFkappaB pathway in TLR-stimulated human monocytes and  
511 macrophages. *J Immunol*. 2008;181(11):8018-8026
- 512 45. Garbers C, Aparicio-Siegmund S, Rose-John S. The IL-6/gp130/STAT3 signaling axis: recent  
513 advances towards specific inhibition. *Curr Opin Immunol*. 2015;34:75-82
- 514 46. Liu J, Liang L, Li D, et al. JAK3/STAT3 oncogenic pathway and PRDM1 expression stratify  
515 clinicopathologic features of extranodal NK/T-cell lymphoma, nasal type. *Oncol Rep*.

- 516 2019;41(6):3219-3232
- 517 47. Mukherjee R, Kanti Barman P, Kumar Thatoi P, Tripathy R, Kumar Das B, Ravindran B.  
518 Non-Classical monocytes display inflammatory features: Validation in Sepsis and  
519 Systemic Lupus Erythematosus. *Sci Rep.* 2015;5:13886
- 520 48. Yamamoto F, Suzuki S, Mizutani A, et al. Capturing Differential Allele-Level Expression  
521 and Genotypes of All Classical HLA Loci and Haplotypes by a New Capture RNA-Seq  
522 Method. *Front Immunol.* 2020;11:941
- 523 49. Martínez A, Bono C, Gozalbo D, Goodridge HS, Gil ML, Yáñez A. TLR2 and Dectin-1  
524 Signaling in Mouse Hematopoietic Stem and Progenitor Cells Impacts the Ability of the  
525 Antigen Presenting Cells They Produce to Activate CD4 T Cells. *Cells.* 2020;9(5)
- 526 50. Sarwal M, Chua M-S, Kambham N, et al. Molecular heterogeneity in acute renal allograft  
527 rejection identified by DNA microarray profiling. *N Engl J Med.* 2003;349(2):125-138
- 528 51. Merad M, Martin JC. Pathological inflammation in patients with COVID-19: a key role for  
529 monocytes and macrophages. *Nat Rev Immunol.* May 2020:1-8
- 530 52. Zhou Y, Fu B, Zheng X, et al. Pathogenic T-cells and inflammatory monocytes incite  
531 inflammatory storms in severe COVID-19 patients. *Natl Sci Rev.* March 2020
- 532 53. Wen W, Su W, Tang H, et al. Immune cell profiling of COVID-19 patients in the recovery  
533 stage by single-cell sequencing. *Cell Discov.* 2020;6:31

534

535
